# Supplementary material for: HLA and KIR genetic association and NK cells in anti-NMDAR encephalitis
Source: Front Immunol. 2024 Jul 10;15:1423149. doi: 10.3389/fimmu.2024.1423149 (PMC11266021; doi:10.3389/fimmu.2024.1423149)
Supplement: Supplementary file 1 [file DataSheet_1.xlsx]

## Sheet: Tabelle1
MitgliedsNr.	Zentrum	Name	Vorname	Titel	Anrede	E-Mail
0001	Kiel, UKSH Neuroimmunolo./klein.Chem	Leypoldt	Frank	PD Dr.	Herr	frank.leypoldt@uksh.de
0002	Düsseldorf UK Neurologie	Melzer	Nico	PD Dr.	Herr	nico.melzer@med.uni-duesseldorf.de
0003	Münster UK Neurologie/Schlafmedizin	Melzer	Kristin Stefanie	Dr.	Frau	kristin.melzer@ukmuenster.de
0004	Jena UK, Neurologie	Geis	Christian	Prof. Dr.	Herr	christian.geis@med.uni-jena.de
0005	Bochum, St. Josef-Hospital, Neurologie	Ayzenberg	Ilya	PD Dr.	Herr	ilya.ayzenberg@rub.de
0006	Kiel UKSH, Pädiatrie	Baalen	Andreas van	PD Dr.	Herr	andreas.vanbaalen@uksh.de
7	Basel UK, Neurologie	Baumgartner	Annette	Dr.	Frau	annette.baumgartner@usb.ch
0008	Hamburg Altona, Neurologie	Berger	Robert	Dr.	Herr	r.berger@asklepios.com
9	Gummersbach KKH Neurologie	Blaes	Franz	Prof. Dr.	Herr	franz.blaes@klinikum-oberberg.de
0010	München Haunersches Pädiatrie	Blaschek	Astrid	Dr.	Frau	astrid.blaschek@med.lmu.de
0011	Würzburg Neurologie	Doppler	Kathrin	Dr.	Frau	doppler_k@ukw.de
0012	Paderborn Neurologie	Ebinger	Friedrich	PD Dr.	Herr	f.ebinger@vincenz.de
0013	Freiburg Psychatrie	Endres	Dominique	PD Dr.	Herr	dominique.endres@uniklinik-freiburg.de
14	Teupitz Neurologie	Faiss	Jürgen Hartmut	Prof. Dr.	Herr	Faiss@dsg-berlin.org
0015	Lüneburg Neurologie	Finke	Alexander	Dr.	Herr	alexander.finke@klinikum-lueneburg.de
0016	Berlin Charité, Neurologie/Neurocure	Finke	Carsten	Prof. Dr.	Herr	carsten.finke@charite.de
0017	Münster UK Neurologie/Schlafmedizin	Dik	Andre	Dr.	Herr	andre.dik@ukmuenster.de
0018	Berlin Charité, Neurologie/Neurocure	Friedemann	Paul	Prof. Dr.	Herr	friedemann.paul@charite.de
0019	Hamburg Eppendorf Neurologie	Friese	Manuel	Prof. Dr.	Herr	manuel.friese@zmnh.uni-hamburg.de
0020	Beelitz-Heilstätten, Neuroreha	Gorsler	Anna	Dr.	Frau	gorsler@kliniken-beelitz.de
0021	Münster UK Neurologie/Schlafmedizin	Groß	Catharina	Dr.	Frau	catharina.gross@ukmuenster.de
0022	Cottbus, Carl-Thime Klinikum, Neurologie	Handreka	Robert	Dr.	Herr	r.handreka@ctk.de
0023	Aachen UK RTHW , Neuropädiatrie	Häusler	Martin	Prof. Dr.	Herr	mhaeusler@ukaachen.de
0024	Mannheim UK Neurologie	Held	Valentin	Dr.	Herr	valentin.held@umm.de
0025	Halle Martha-Maria Neurologie	Hoffmann	Frank	Dr.	Herr	frank.hoffmann@martha-maria.de
26	Dortmund, Westphalen, Neurologie	Hofstadt-van Oy	Ulrich	Dr.	Herr	Ulrich.hofstadt@klinikum-Westfalen.de
0027	Osnabrück Neurologie	Kellinghaus	Christoph	Dr.	Herr	christoph.kellinghaus@klinikum-os.de
0028	Halle Martha-Maria Neurologie	Kraft	Andrea	Dr.	Frau	andrea.kraft@martha-maria.de
0029	Essen Alfried-Krupp KH Neurologie	Krämer	Markus	Prof. Dr.	Herr	markus.kraemer1977@gmx.de
0030	Bochum, St. Josef-Hospital, Neurologie	Krogias	Christos	PD Dr.	Herr	christos.krogias@rub.de
0031	Berlin Charité, Neurologie/Neurocure	Körtvélyessy	Peter	Dr.	Herr	peter.koertvelyessy@charite.de
0032	München LMU Neuroimmunologie/Neurologie	Kümpfel	Tanja	Prof. Dr.	Frau	tania.kuempfel@med.uni-muenchen.de
0033	Ulm UK Neurologie	Lewerenz	Jan	Prof. Dr.	Herr	jan.lewerenz@uni-ulm.de jan.lewerenz@gogglemail.com
0034	Hoyerswerda, Neurologie	Linsa	Andeas	Dr.	Herr	Andreas.Linsa@sana.de
0035	Düsseldorf, LVR, Neurologie	Menge	Til	Prof. Dr.	Herr	til.menge@lvr.de
0036	Celle Allg. KH, Neurologie	Heide	Wolfgang	Prof. Dr.	Herr	wh.heide@web.de
0037	München LMU Neuroimmunologie/Neurologie	Havla	Joachim	Dr.	Herr	joachim.havla@med.lmu.de
0038	Erkelenz, Neurologie	Malter	Michael	PD Dr.	Herr	sek-neurologie@hjk-erkelenz.de
0039	Düsseldorf UK Neurologie	Meuth	Sven	Prof. Dr. Dr.	Herr	sven.meuth@uni-duesseldorf.de
0040	Münster UK Neurologie/Schlafmedizin	Kerin (geb. Mönig)	Constanze	Dr.	Frau	constanze.moenig@ukmuenster.de
0041	Zürich Stadtspital Neurologie	Mono	Marie-Luise	PD Dr.	Frau	marie-luise.mono@triemli.zuerich.ch
0043	Elmshorn, Psychatrie	Obrocki	Jost	Dr.	Herr	jost.obrocki@sana.de
0044	Greifswald, Neurologie	Poderwils	Felix von	PD Dr.	Herr	felix.podewils@uni-greifswald.de
0045	Berlin Charité, Pschologie/Psychatrie	Priller	Josef	Prof. Dr.	Herr	josef.priller@charite.de
0046	Dortmund, Klinikum, Neurologie	Reimann	Gernot	Dr.	Herr	gernot.reimann@klinikumdo.de
0047	Düsseldorf UK Neurologie	Ringelstein	Marius	Dr.	Herr	marius.ringelstein@med.uni-duesseldorf.de
0048	Datteln, Neuropädiatrie	Rostasy	Kevin	PD Dr.	Herr	k.rostasy@kinderklinik-datteln.de
0049	Hamburg Nord, Neurologie	Seidel	Günter	Prof. Dr.	Herr	g.seidel@asklepios.com
0050	Hamburg Barnbek Neurologie	Stammel	Oliver	Dr.	Herr	o.stammel@asklepios.com
0052	Leipzig Neurologie	Stoppe	Muriel	Dr.	Frau	stoppemuriel@gmail.com
0053	Würzburg Neurologie	Sommer	Claudia	Prof. Dr.	Frau	sommer@uni-wuerzburg.de
0054	Hannover, MHH Neurologie	Sühs	Kurt-Wolfram	PD Dr.	Herr	suehs.kurt-wolfram@mh-hannover.de
0055	Hamburg Eppendorf, Neurologie	Kaufmann	Max	Dr.	Herr	m.kaufmann@uke.de
0056	Lübeck Sana Kliniken, Neurologie	Schaumberg	Jens	Dr.	Herr	jens.schaumberg@sana.de
0057	Göttingen, Neurologie	Schmidt	Jens	Prof. Dr.	Herr	j.schmidt@med.uni-goettingen.de
58	Henningsdorf, Oberhavel Kliniken	Schreiber	Stephan	Prof. Dr.	Herr	Stephan Schreiber' <Stephan.Schreiber@oberhavel-kliniken.de>
0059	Flensburg, Neurologie	Stolze	Henning	Prof. Dr.	Herr	stolzehe@diako.de
0060	Aachen UK RTHW Neurologie	Tauber	Simone	Prof. Dr.	Frau	stauber@ukaachen.de
0061	München LMU Neuroimmunologie/Neurologie	Thaler	Franziska	Dr.	Frau	franziska.thaler@med.uni-muenchen.de
0062	Leipzig Neurologie	Then Bergh	Florian	Prof. Dr.	Herr	florian.thenbergh@medizin.uni-leipzig.de
0063	Hannover, MHH Neurologie	Trebst	Corinna	Prof. Dr.	Frau	trebst.corinna@mh-hannover.de
64	Ludwigshafen, Neurologie	Urbanek	Christian	Dr.	Herr	urbanekc@klilu.de
0065	Lübeck UKSH, Neuroimmunolog./klein. Chem.	Wandinger	Klaus-Peter	Prof. Dr.	Herr	, Prüss
0066	Regensburg, UK Neurologie	Weissert	Robert	Prof. Dr.	Herr	robert.weissert@ukr.de
0068	Heidelberg, Neurologie	Wildemann	Brigitte	Prof. Dr.	Frau	brigitte.wildemann@med.uni-heidelberg.de
0069	Bochum, KnappschaftsKH, Neurologie	Mues	Sigrid	Dr.	Frau	sigrid.mues@kk-bochum.de
0070	Bielefeld Mara, Epilepsiezentrum	Bien	Christian	Prof. Dr.	Herr	christian.bien@mara.de
0071	Berlin Charité, Neurologie/Neurocure	Prüß	Harald	Prof. Dr.	Herr	harald.pruess@charite.de
0072	Zürich, UK Neurologie	Balint	Bettina	Dr.	Frau	Bettina.Balint@usz.ch
0073	Mühlhausen, Neurologie	Trendelenburg	George	Prof. Dr.	Herr	g.trendelenb@oehk.de
0074	Ludwighafen, Neurologie	Grau	Armin	Prof. Dr.	Herr	graua@klilu.de
0075	Münster UK Neurologie/Schlafmedizin	Lehrich	Christoph	Dr.	Herr	christophlehrich@gmx.de
0076	Münster UK Neurologie/Schlafmedizin	Gallus	Marco	Dr.	Herr	marco.gallus@ukmuenster.de
0077	Bochum, St. Josef-Hospital, Neurologie	Hellwig	Kerstin	PD Dr.	Frau	k.hellwig@klinikum-bochum.de
0078	Ohne Zentrum (ehem. Wermsdorf)	Ehrlich	Sven	Dr.	Herr	sven.ehrlich@kh-hubertusburg.de
0079	Frankfurt, Epilepsiezentrum & Neurologie	Bauer	Sebastian	Dr.	Herr	Sebastian.Bauer@kgu.de
0080	Frankfurt, Epilepsiezentrum & Neurologie	Siebenbrodt	Kai	Dr	Herr	Siebenbrodt@med.uni-frankfurt.de
0081	Frankfurt, Epilepsiezentrum & Neurologie	Rosenow	Felix	Prof. Dr.	Herr	Rosenow@med.uni-frankfurt.de
0082	Jena UK, Neurologie	Wickel	Jonathan	Dr.	Herr	Jonathan.Wickel@med.uni-jena.de
0083	Jena UK, Neurologie	Ha-Yeun	Chung	Dr.	Herr	Ha-Yeun.Chung@med.uni-jena.de
0084	Weilmünster Neurologie	Adelmann	Michael	Dr.	Herr	mhpa57@gmail.com
0085	Aschaffenburg, Neurologie	Benesch	Sonka	Dr.	Frau	sonka.benesch@klinikum-ab-alz.de
0086	Münster UK Neurologie/Schlafmedizin	Strippel	Christine	Dr.	Frau	christine.strippel@ukmuenster.de Christine.Strippel@ndcn.ox.ac.uk
0087	Gelsenkirchen, Neurologie	Wagner	Judith	Dr.	Frau	Judith.Wagner@evk-ge.de
0088	Ulm UK Neurologie	Türedi	Methap		Frau	mehtap.tueredi@uni-ulm.de
0089	Kiel UKSH, Neuroimm./klein. Chemie	Jansen	Martina		Frau	Martina.Jansen@uksh.de
0090	Kiel UKSH, Neuroimm./klein. Chemie	Schmütz	Ina-Isabelle		Frau	ina-isabelle.schmuetz@uksh.de
0091	Osnabrück Neurologie	Berning	Sascha	Dr.	Herr	Sascha.Berning@klinikum-os.de
0092	Saarbrücken, Neurologie	Binder	Andreas	PD. Dr.	Herr	abinder@klinikum-saarbruecken.de>
0093	Halle, Martha-Maria, Neurologie	Gebhard	Marcel	Dr.	Herr	marcel.gebhardt@martha-maria.de
0094	Bad Salzuflen, MVZ Labor Krone	Bien	Corinna	Dr.	Frau	bien.corinna@gmail.com
0095	Bonn, Neurodegeneration/Gerondopsych	Bernsen	Sarah	Dr.	Frau	sarah.bernsen@ukbonn.de
0096	Ulm UK Neurologie	Penner	Loana		Frau	loana.penner@uni-ulm.de
0097	Kiel UKSH, Neuroimm./klein. Chemie	Dargvainiene	Justina	Dr.	Frau	Justina.Dargvainiene@uksh.de
98	Bochum, KnappschaftsKH, Neurologie	Ismail	Fatme Seval	Dr.	Frau	ismaf88@gmail.com
0099	Heidelberg, Pädiatrie	Syrbe	Steffen	Dr.	Herr	steffen.syrbe@med.uni-heidelberg.de
0100	Kiel UKSH, Neuroimm./klein. Chemie	Schröder	Ina		Frau	Ina.Schroeder@uksh.de
102	Bonn UK, Pädiatrie	Hillebrand	Philip	Dr.	Herr	philip.hillebrand@ukbonn.de
0103	München LMU Neuroimmunologie/Neurologie	Eisenhut	Katharina	Dr.	Frau	katharina.eisenhut@med.uni-muenchen.de
0104	Würzburg Neurologie	Appeltshauser	Luise	Dr.	Frau	appeltshau_l@ukw.de
0105	Lübben, Neurologie	Entscheva	Marina	Dr.	Frau	m.entscheva@asklepios.com
0106	Altenburg Neurologie	Baatz	Sebastian	Dr.	Herr	sebastian.baatz@web.de
107	Mainz, UK Neurologie	Bittner	Stefan	Prof. Dr.	Herr	bittner@uni-mainz.de
0108	Oldenburg, Neurologie	Witt	Karsten	Prof. Dr.	Herr	neurologie@evangelischeskrankenhaus.de
0109	Ingolstadt, Neurologie	Pfefferkorn	Thomas	Prof. Dr.	Herr	thomas.pfefferkorn@klinikum-ingolstadt.de
0110	Mainz, UK Neurologie	Piepgras	Johannes	Dr.	Herr	johannes.piepgras@unimedizin-mainz.de
0111	Marburg UK Neurologie	Zieger	Lara	Dr.	Frau	zieger@med-uni-marburg.de
0112	Frankfurt, Epilepsiezentrum & Neurologie	Reinecke	Raphael	Dr.	Herr	raphael.reinecke@kgu.de
0113	Göttingen, Neurologie	Fitzner	Dirk	Dr.	Herr	d.fitzner@med.uni-goettingen.de
0114	Nordhausen, Neurologie	Bittner	Daniel	Dr.	Herr	Daniel.Bittner@shk-ndh.de
0115	Basel UK, Neurologie	Rüegg	Stephan	Prof. Dr.	Herr	Stephan.Rueegg@usb.ch
0116	Basel UK, Neurologie	Pröbstel	Anne-Katrin	PD Dr.	Frau	anne-katrin.proebstel@usb.ch
0117	Münster UK Neurologie/Schlafmedizin	Räuber	Saskia Jania		Frau	Saskiajanina.Raeuber@ukmuenster.de
0118	Bremen Klinikum Nord, Neurologie	von Mering	Matthias	Dr.	Herr	matthias.vonmering@klinikum-bremen-nord.de
0119	Bonn, UK Psychotherapie	Rohner	Henrik	Dr.	Herr	henrik.rohner@ukbonn.de
0120	Bonn, UK Psychotherapie	Philipsen	Alexandra	Prof. Dr.	Frau	alexandra.philipsen@ukbonn.de
0121	Göttingen, Psychatrie	Hansen	Niels	PD Dr.	Herr	niels.hansen@med.uni-goettingen.de
0122	Homburg/Saar Pädiatrie	Flotats-Bastardas	Marina	Dr.	Frau	marina.flotats-bastardas@uks.eu
0123	Hamburg Marienkrankhaus, Neurologie	Edelhoff	Lena	Dr.	Frau	edelhoff.neuro@marienkrankenhaus.org
0124	Erlangen, Pädiatrie	Trollmann	Regina	Prof. Dr.	Frau	Regina.Trollmann@uk-erlangen.de
0125	Marburg UK Neurologie	Knake	Susanne	Prof. Dr.	Frau	knake@med.uni-marburg.de
0127	Münster UK Neurologie/Schlafmedizin	Rau	Johanna Maria Helena	Dr.	Frau	johanna.rau@ukmuenster.de
0128	Münster UK Neurologie/Schlafmedizin	Meyer zu Hörste	Gerd	Prof. Dr.	Herr	gerd.mzh@uni-muenster.de
0129	Münster UK Neurologie/Schlafmedizin	Grauer	Oliver	Prof. Dr. Dr.	Herr	oliver.grauer@ukmuenster.de
0130	Münster UK Neurologie/Schlafmedizin	Kovac	Stjepana	PD Dr.	Frau	Stjepana.Kovac@ukmuenster.de
0131	Jena UK, Neurologie	Baade-Büttner	Carolin	Dr.	Frau	Carolin.Baade-Buettner@med.uni-jena.de
0133	Bonn UK, Pädiatrie	Fazeli	Walid	Dr.	Herr	walid.fazeli@ukbonn.de
0134	Münster UK Neurologie/Schlafmedizin	Lünemann	Jan	Prof. Dr.	Herr	jan.luenemann@ukmuenster.de
0135	Kiel UKSH, Neuroimm./klein. Chemie	Schuster	Simon	Dr.	Herr	simon.schuster@uksh.de
0136	Kiel UKSH, Neuroimm./klein. Chemie	Schreyer	Gesa		Frau	gesa.schreyer@uksh.de
0137	Ulm UK Neurologie	Senel	Makbule	Dr.	Frau	makbule.senel@uni-ulm.de
0138	Freiburg, Pädiatrie	Storm van`s Gravesande	Karin	Dr.	Frau	karin.storm.vans.gravesande@uniklinik-freiburg.de
0139	Potsdam, Pädiatrie	Dreesmann	Mona	Dr.	Frau	mona.dreesmann@klinikumwb.de
0140	Ulm UK Neurologie	Tumani	Hayrettin	Prof.Dr.	Herr	hayrettin.tumani@uni-ulm.de
0141	Düsseldorf UK, Pädiatrie	Karenfort	Michael	Dr.	Herr	michael.karenfort@med.uni-duesseldorf.de
0143		Sturm	Dietrich	Dr.	Herr	dietrich.sturm@bethesda-wuppertal.de
0144	Magdeburg UK Neurologie	Haghikia	Aiden	Prof. Dr.	Herr	aiden.haghikia@med.ovgu.de
0145	Hamburg Eppendorf, Neurologie	Pfeffer	Lena Kristina		Frau	l.pfeffer@uke.de
0146	Rüdersdorf, Neurologie	Decker	Julia Maren	Dr.	Frau	juliamaren.decker@immanuelalbertinen.de
0147	Homburg/Saar, Neurologie	Fousse	Mathias	Dr.	Herr	mathias.fousse@uks.eu
0148	Ulm, Bundeswehrkrankenhaus	Meister	Monika	Dr.	Frau	monikameister@bundeswehr.org
149	Augsburg UK, Neuropädiatrie	Schimmel	Mareike	Dr.	Frau	mareike.schimmel@uk-augsburg.de
0150	Kiel UKSH, Neuroimm./klein. Chemie	Falk	Kim Kristin		Frau	kimkristin.falk@uksh.de
0151	Osnabrück Neurologie	Juranek	Aleksandra	Dr.	Frau	aleksandra.juranek@klinikum-os.de
0152	Jena UK Pädiatrie	Huppke	Peter	Prof. Dr.	Herr	peter.huppke@med.uni-jena.de
0153	Bonn Epileptoloige	Rüber	Theodor	PD Dr.	Herr	theodor.rueber@ukbonn.de
0154	Düsseldorf UK Neurologie	Vogel	Niklas		Herr	niklas.vogel@med.uni-duesseldorf.de
0155	Bonn Epileptoloige	Harms	Antonia		Frau	antonia.harms@ukbonn.de
156	Zürich, UK Neurologie	Reichen	Ina	Dr.	Frau	inacamille.reichen@usz.ch
157	Kiel UKSH, Neuroimm./klein. Chemie	Kuhlenbäumer	Gregor	Prof. Dr.	Herr	gregor.kuhlenbaeumer@uksh.de
158	Kempen Hospital Heiligen Geist, Neurologie	Harmel	Jens	Dr.	Herr	jens.harmel@artemed.de
159	Ulm UK Neurologie	Greshake	Britta		Frau	britta.greshake@uni-ulm.de
160	Ulm UK Neurologie	Rapp	Daniel		Herr	daniel.rapp@uni-ulm.de
161	Ulm UK Neurologie	Hofmann	Christian		Herr	christian-1.hofmann@uni-ulm.de
162	Augsburg UK, Neurologie	Schneider	Hauke	PD Dr.	Herr	hauke.schneider@uk-augsburg.de
163	Dortmund, Klinikum, Neurologie	Rehmann	Robert	Dr.	Herr	robert.rehmann@gmx.de
164	Kiel, UKSH Neuroimmunolo./klein.Chem	Tietz	Anja		Frau	anja.tietz@uksh.de
165	Passau Neurologie	Freilinger	Tobias	Prof. Dr.	Herr	tobias.freilinger@klinikum-passau.de
166	Ulm Neurologie	Becker	Stefanie		Frau	stefanie.becker@rku.de
167	Giessen, Neurologie	Berghoff	Martin	Prof. Dr.	Herr	martin.berghoff@neuro.med.uni-giessen.de
168	Essen, Alfried-Krupp-Krankenhaus, Neurologie	Pompsch	Mosche	Dr.	Herr	m.pomsch@unitybox.de
169	Bochum, St. Joseph, Neurologie	Grüter	Thomas	Dr.	Herr	thomas.grueter@rub.de
170	Graz Neurologie	Seifert-Held	Thomas	PD Dr.	Herr	thomas.seifert@medunigraz.at
171	Bochum, St. Joseph, Neurologie	Klausewitz	Jaqueline		Frau	jaquelineklausewitz@gmx.de
172	Giessen, Neurologie	Huttner	Hagen	Prof. Dr.	Herr	hagen.huttner@neuro.med.uni-giessen.de
173	München TU Pädiatrie	Kraus	Verena	Dr.	Frau	verana.kraus@mri.tum.de
174	München TU Neurologie	Berthele	Achim	Dr.		achim.berthele@tum.de
175	Würzburg Pädiatrie	Spiegler	Juliane	Prof. Dr.	Frau	spiegler_J@ukw.de
176	Kiel, UKSH Neuroimmunolo./klein.Chem	Jansen	Mareike		Frau	mareike.jansen@uksh.de
177	Leipzig, Neurologie	Schilling	Ruth		Frau	ruth.schilling@medizin.uni-leipzig.de
178	Kiel, UKSH Neuroimmunolo./klein.Chem	Stürner	Klarissa Hanja	PD Dr.	Frau	klarissa.stuerner@uksh.de
179	Ulm UK Neurologie	Wagner	Jan	PD Dr.	Herr	Jan.Wagner@rku.de
180	Rostock, Neurologie	Berger	Birgit		Frau	birgit.berger@med.uni-rostock.de
181	Hamburg Alsterdorf, Epilepsie-Zentrum	Simova	Olga	Dr.	Frau	olga.simova@eka.alsterdorf.de
182	Bonn, Neurodegeneration/Gerondopsych	Castro-Gomez	Sergio	Dr. Dr.	Herr	sergio.castro-gomez@ukbonn.de
183	Bonn, Neurodegeneration/Gerondopsych	Tacik	Pawel	PD Dr.	Herr	Pawel.Tacik@ukbonn.de
184	Essen, Neurologie	Martinez Quesada	Carlos	Dr.	Herr	carlos.quesada@uk-essen.de
185	Rostock, Neurologie	Retzlaff	Nele		Frau	nele.retzlaff@med.uni-rostock.de
186	ohne Zentrum (ehem. Berlin, Charite; Pädiatrie)	Knierim	Ellen	Dr.	Frau	ellen.knierim@charite.de
187	Halle, UK Neurologie	Emmer	Alexander	Dr.	Herr	alexander.emmer@uk-halle.de
188	Kiel UKSH, Neuroimm./klein. Chemie	Esser	Daniela	Dr.	Frau	daniela.esser@uksh.de
189	Erlangen, Neurologie	Tsaktanis	Thanos	Dr	Herr	thanos.tsaktanis@uk-erlangen.de
190		Saathoff	Yannic	Dr.	Herr	yannicsaathoff@gmail.com
191	Berlin Charité, Neurologie/Neurocure	Wurdack	Kartharina	Dr.	Frau	katharina.wurdack@charite.de
192	Mainz, UK Pädiatrie	Ehrhardt	Laura	Dr.	Frau	laura.erhardt@unimedizin-mainz.de
193	Ingolstadt, Neurologie	Haro Alizo	Yetzenia Dubraska	Dr.	Frau	yetzeniah@gmail.com
194	Halle, UK Neurologie	Vogtmann	Max	Dr.	Herr	max.vogtmann@uk-halle.de
195	Aschaffenburg, Neurologie	Bähr	Oliver	Prof. Dr.	Herr	oliver.baehr@klinikum-ab-alz.de
196	Hamburg Asklepios Barmbek, Neurologie	Möller	Fabian	Dr.	Herr	f.moeller@asklepios.com
197	Münster, Pädiatrie	Deba	Timo	Dr.	Herr	timo.deba@ukmuenster.de
198	Traunstein, Neurologie	Etgen	Thorleif	Prof. Dr.	Herr	thorleif.etgen@kliniken-sob.de
199	Erlangen, Neurologie	Seifert	Frank	Prof. Dr.	Herr	frank.seifert@uk.erlangen.de
200	Hannover, MHH Neurologie	Ratuszny	Dominica	Dr.	Frau	ratuszny.dominica@mh-hannover.de
201	Erfurt, Neurologie	Steinbrecher	Andeas	Prof. Dr.	Herr	andreas.steinbrecher@helios-gesundheit.de
202	Aachen UK RTHW Neurologie	Bohn	Amelie	Dr.	Frau	abohn@ukaachen.de
203	Köln UK Neurologie	Madlener	Marie	Dr.	Frau	marie.madlener@uk-koeln.de
204	UKSH Kiel, Neurologie	Margraf	Niels	PD Dr.	Herr	n.margraf@neurologie.uni-kiel.de
205	Giessen, Neurologie	Pfeuffer	Steffen	Dr.	Herr	steffen.pfeuffer@neuro.med.uni-giessen.de
206	Giessen, Neurologie	Schramm	Patrick	PD Dr.	Herr	patrick.schramm@neuro.med.uni-giessen.de
207	LMU München/Großraden	Dominik	Julian	Dr.	Herr	j.dominik@med.uni-muenchen.de
208	Ulm UK Neurologie	Wellmer	Njiku Melchior		Herr	njiku.wellmer@uni-ulm.de
209	Hamburg Eppendorf, Neurologie	Fischbach	Felix		Herr	f.fischbach@uke.de
210	Düsseldorf UK Neurologie	Pul	Duygu	PD Dr.	Herr	duygu.pul@med.uni-duesseldorf.de.
211	Vogtareuth, Schön Klinik	Rauchenzauner	Markus	Prof. Dr.	Herr	mrauchenzauner@schuoen-klinik.de
212	Berlin; Charité Pädiatrie	Nikolaus	Marc	Dr.	Herr	marc.nikolaus@charite.de
213	Klinikum Kassel, Neurologie	Thies	Katrin	Dr	Frau	katrin.thies@gnh.net
214	Dresden UK Neurologie	Lesser	Martin	Dr.	Herr	martin.lesser@ukdd.de
215	Dresden UK Neurologie	Kather	Annika	Dr	Frau	annika.kather@ukdd.de
216	Mönchenglatbach, Maria-Hilf	Kerkhoff	Ruth		Frau	ruth.kerkhoff@mariahilf.de
217	Worms, Neurologie	Kern	Rolf	Prof. Dr.	Herr	roft.kern@klinikum-worms.de
