# Supplementary material for: HLA and KIR genetic association and NK cells in anti-NMDAR encephalitis
Source: Front Immunol. 2024 Jul 10;15:1423149. doi: 10.3389/fimmu.2024.1423149 (PMC11266021; doi:10.3389/fimmu.2024.1423149)
Supplement: Supplementary file 2 [file Table_1.xlsx]

## Sheet: Supplementary Table 1
Supplementary Table 1. Overall GWAS cohort used for HLA imputation, stratified by ethnicity and genotyping platform.
	Phenotype
Cohort	Control (n=2806)	Cases (n=479)
African Affymetrix Discovery	227	22
East Asian Affymetrix Discovery	67	53
European Affymetrix Discovery	249	85
European Illumina Discovery	1194	96
European PMRA Discovery	407	90
European PMRA Replication	395	86
Non-European PMRA Replication	267	47
	2806	479

## Sheet: Supplementary Table 2
Supplementary Table 2. HLA and KIR sequencing subcohort stratified by ethnicity, and tumor association in cases.
	Phenotype		Tumor association in Cases*
Cohort	Control (n=1519)	Cases (n=323)	Teratoma (n=71)	Non-teratoma (n=238)
African	47	29	8	21
African-European	55	21	4	17
Asian	114	31	8	22
Asian-European	34	24	10	14
European	1269	218	41	164
*A total of 12 patients had other associated tumors and 2 had no information regarding tumor assocation

## Sheet: Supplementary Table 3
Supplementary Table 3. Clinical data from 16 patients with available PBMCs.
Sex	Age at onset	Phenotype	Tumor	Delay onset-PBMC (days)	Active disease at PBMC date	treatment before PBMC	Treatment classification	Delay treatment-PBMC	Type of treatment
female	31	Typical anti-NMDAR encephalitis	no	191	no	yes	late treatment	6 months	CC + IVIG
male	24	Typical anti-NMDAR encephalitis	no	43	yes	yes	early treatment	9 days	IVIG
female	32	Typical anti-NMDAR encephalitis	ovarian teratoma	54	yes	yes	early treatment	11 days	CC
male	25	Typical anti-NMDAR encephalitis	no	38	yes	yes	early treatment	6 days	CC + IVIG
male	6	Typical anti-NMDAR encephalitis	no	22	yes	yes	early treatment	2 days	CC + IVIG
male	3	Typical anti-NMDAR encephalitis	no	23	yes	no	no treatment
female	24	Typical anti-NMDAR encephalitis	no	16	yes	no	no treatment
female	5	Typical anti-NMDAR encephalitis	no	128	yes	yes	late treatment	1 month	CC + IVIG
female	48	Typical anti-NMDAR encephalitis	no	44	yes	no	no treatment
female	29	Typical anti-NMDAR encephalitis	ovarian teratoma	38	yes	yes	late treatment	24 days	CC + IVIG + RTX +CP
female	12	Typical anti-NMDAR encephalitis	no	8	yes	no	no treatment
female	20	Typical anti-NMDAR encephalitis	no	46	yes	yes	early treatment	9 days	CC + IVIG
female	17	Typical anti-NMDAR encephalitis	no	61	yes	yes	late treatment	1 month	CC + IVIG + RTX
female	35	Typical anti-NMDAR encephalitis	ovarian teratoma	1220	no	yes	late treatment	4 months	CC + IVIG
female	19	Typical anti-NMDAR encephalitis	no	36	yes	yes	early treatment	10 days	CC + IVIG + RTX
female	24	Typical anti-NMDAR encephalitis	ovarian teratoma	286	no	yes	late treatment	10 months	IVIG + RTX +CP
Abbreviations: CC, corticosteroids; CP, cyclophosphamide; IVIG, intravenous immunoglobulin; RTX, rituximab

## Sheet: Supplementary Table 4
Supplementary Table 4. HLA association effects in all sequenced anti-NMDAR teratoma vs. non-teratoma cases, teratoma cases vs. controls, and non-teratoma cases vs. controls, analyzed using a Generalized Linear Equation modeling after control of three Principal Components.
			Teratoma vs. Non-teratoma		Teratoma vs. Controls		Non-Teratoma vs. Controls
Allele	Teratoma (n=71)	Non-teratoma (n=238)	OR	P-value*	OR	P-value*	OR	P-value**
DQA1*01:01	0.268 (19)	0.303 (72)	0.863855	0.634176	1.79411	0.0483931	2.25232	2.32627e-05
DQB1*05:01	0.268 (19)	0.336 (80)	0.743204	0.334992	1.5515	0.133119	2.09185	0.000125995
DRB1*01:01	0.169 (12)	0.176 (42)	1.05797	0.879423	1.86911	0.0772101	2.13197	0.0061336
DRB4*01:03	0.296 (21)	0.277 (66)	1.07258	0.819311	0.590354	0.0619435	0.530402	0.00023336
DRB1*04:01	0.085 (6)	0.063 (15)	1.6554	0.326394	1.02112	0.963894	0.57702	0.674629
DRB1*11:01	0.127 (9)	0.147 (35)	0.83059	0.646636	1.23053	0.591723	1.29687	1
DRB3:03:01	0.099 (7)	0.059 (14)	1.63155	0.324737	0.739305	0.480476	0.498767	0.113436
Teratoma status was not present in 14 cases. *P-value non-corrected due to small sample size; **P-value FDR corrected

## Sheet: Supplementary Table  5
Supplementary Table 5. HLA association effects in European anti-NMDAR cases vs. controls, analyzed using a Generalized Linear Equation modeling after control of three Principal Components.
Allele	OR	Cases (n=218)	Controls (n=1269)	P-value*
DQA1*01:01	2.09986	0.326 (71)	0.187 (237)	0.000116269
DQB1*05:01	1.86703	0.339 (74)	0.217 (275)	0.00331535
DRB1*01:01	2.1381	0.234 (51)	0.125 (159)	0.00100975
DRB4*01:03	0.518168	0.266 (58)	0.412 (523)	0.000180096
* P-value FDR corrected for multiple comparisons.

## Sheet: Supplementary Table 6
Supplementary Table 6. HLA association effects in European anti-NMDAR cases vs. controls, analyzed using a Generalized Linear Equation modeling after control of three Principal Components and iteratively controlling for the most significant allele.
Allele	OR	Cases (n=218)	Controls (n=1269)	P-value*	DQA1*01:01
DQA1*01:01	2.28403	0.326 (71)	0.187 (237)	1.51333e-05	N/A
DRB4*01:03	0.557676	0.266 (58)	0.412 (523)	0.00189835	1.1113e-05
* P-value FDR corrected for multiple comparisons. / Abbreviations; N/A: Not applicable

## Sheet: Supplementary Table 7
Supplementary Table 7. Analysis of carrier frequencies for HLA-DQB1*05:02, HLA-A*11:01 and HLA-A*02:07
Allele	OR	Cases (n=323)	Controls	P-value *
HLA-DQB1*05:02	2.21927	0.080 (26)	0.036 (56)	0.0269585
HLA-A*11:01	1.08358	0.127 (41)	0.122 (186)	1
HLA-A*02:07	0.701894	0.009 (3)	0.009 (14)	- **
*FDR corrected ** Not computed due to low carrier frequency (< 5%)

## Sheet: Supplementary Table 8
Supplementary Table 8. Meta-regression of Dominant Copy Number Variation effects in cases and controls
Gene	Effect	Std. Error	OR	P-value	P-value FDR corrected	Direction**	Heterogeneity P-value
KIR2DL3	-0.2407	0.193	0.786077	0.2124	0.5841	+--+-	0.6473
KIR2DS3T	0.2948	0.2331	1.34286	0.206	0.5841	0+-++	0.7289
KIR2DL1	0.1571	0.4222	1.17011	0.7098	0.9647	++0--	0.904
KIR2DL2	0.1437	0.1296	1.15454	0.2676	0.59466	++++-	0.3758
KIR2DS4Del	0.0907	0.1553	1.09494	0.5592	0.878743	++-+-	0.3498
KIR2DL5	0.1262	0.128	1.13451	0.324	0.648	++--+	0.2109
KIR3DL2	N/A	N/A	N/A	N/A	N/A	N/A	N/A
KIR2DP1	0.1379	0.3967	1.14786	0.7281	0.9647	-+0--	0.9305
KIR2DL5B	0.5411	0.1417	1.7179	0.0001347	0.0029634	+++--	0.1327
KIR2DL4	N/A	N/A	N/A	N/A	N/A	N/A	N/A
KIR3DL3	N/A	N/A	N/A	N/A	N/A	N/A	N/A
KIR2DS3	0.3008	0.1386	1.35094	0.02999	0.164945	++-++	0.5312
KIR2DS3C	0.3526	0.1436	1.42276	0.01408	0.15488	+++--	0.5234
KIR2DS5	0.0429	0.1422	1.04383	0.763	0.9647	+++-+	0.8861
KIR2DS1	-0.1108	0.136	0.895118	0.4151	0.761017	+---+	0.7108
KIR3DS1	0.0916	0.1358	1.09593	0.5002	0.846492	++--+	0.4985
KIR3DL1	0.9207	0.4121	2.51105	0.02549	0.164945	+++0+	0.9434
KIR2DS4wt	0.1678	0.1324	1.1827	0.2049	0.5841	-+-++	0.4948
KIR2DS2	0.143	0.1297	1.15373	0.2703	0.59466	++++-	0.3086
KIR2DS5C	0.5324	0.3615	1.70301	0.1408	0.5841	++---	0.5067
KIR2DS5T	0.029	0.1493	1.02942	0.8458	0.979347	+-+-+	0.7938
KIR2DL5A	0.0365	0.1365	1.03717	0.7893	0.9647	++--+	0.7396
Analyzed using General Linear Regression modelling after control of first three intra-ethnic Principal Components within each ethnic group.*Abbreviations; N/A: Not Applicable; ** Order of cohorts: African, European, Asian, African-European, Asian-European "+": Increased in cases, "-": Decreased in cases, "?": Not examined in cohort and thus has a smaller corresponding weight, "0": Not present in …

## Sheet: Supplementary Table 9
Supplementary Table 9. Additive Count Number Variation effects in all European cases and controls, analyzed using General Linear Regression modelling after control of first three Principal Components.
				Score
KIR Locus	Effect	P-value	P-value FDR corrected	Cases (n=218)	Controls (n=1269)
KIR2DL1	0.0271965	0.416389	1	1.69 ± 0.52	1.66 ± 0.55
KIR2DL2	0.0618796	0.132101	1	0.66 ± 0.70	0.59 ± 0.66
KIR2DL3	-0.0612197	0.135737	1	1.34 ± 0.70	1.41 ± 0.66
KIR2DL4	0.0348374	0.0300204	1	2.02 ± 0.29	2.00 ± 0.25
KIR2DL5	0.029715	0.555114	1	0.71 ± 0.79	0.68 ± 0.82
KIR2DL5A	-0.0700845	0.0760392	1	0.34 ± 0.50	0.45 ± 0.67
KIR2DL5B	0.0997995	0.000509095	0.0413375	0.36 ± 0.54	0.24 ± 0.46
KIR2DP1	9.79528e-05	0.997684	1	1.68 ± 0.54	1.67 ± 0.55
KIR2DS1	-0.0640545	0.0716197	1	0.34 ± 0.51	0.43 ± 0.59
KIR2DS2	0.0629866	0.122238	1	0.64 ± 0.69	0.59 ± 0.66
KIR2DS3	0.0528201	0.173471	1	0.40 ± 0.63	0.35 ± 0.63
KIR2DS3C	0.0378783	0.242615	1	0.31 ± 0.51	0.28 ± 0.53
KIR2DS3T	0.0149418	0.36364	1	0.08 ± 0.28	0.07 ± 0.26
KIR2DS4Del	0.000886743	0.983828	1	1.02 ± 0.71	1.07 ± 0.73
KIR2DS4wt	0.0622569	0.105993	1	0.61 ± 0.69	0.48 ± 0.64
KIR2DS5	-0.00434249	0.894586	1	0.31 ± 0.51	0.31 ± 0.53
KIR2DS5C	0.00995693	0.318979	1	0.05 ± 0.22	0.02 ± 0.16
KIR2DS5T	-0.0142994	0.648121	1	0.25 ± 0.46	0.29 ± 0.52
KIR3DL1	0.0623264	0.0877062	1	1.65 ± 0.53	1.57 ± 0.60
KIR3DL2	0.000323765	0.964472	1	1.98 ± 0.12	1.99 ± 0.12
KIR3DL3	-0.00107339	0.710503	1	2.00 ± 0.00	2.00 ± 0.05
KIR3DS1	-0.0216415	0.558057	1	0.37 ± 0.53	0.43 ± 0.62
* KIR2DS3 = KIR2DS3T + KIR2DS3C / KIR2DL5 = KIR2DL5B + KIR2DL5A / KIR2DS5 = KIR2DS5C + KIR2DS5T

## Sheet: Supplementary Table 10
Supplementary Table 10. Dominant Count Number Variation effects in all European cases and controls, analyzed using General Linear Regression modelling after control of first three Principal Components.
KIR Locus	OR	P-value	P-value FDR corrected	Cases (n=218)	Controls (n=1269)
KIR2DL1	1.47467	0.421573	1	0.977 (213)	0.968 (1229)
KIR2DL2	1.0861	0.577617	1	0.537 (117)	0.519 (659)
KIR2DL3	0.720293	0.132212	1	0.858 (187)	0.899 (1141)
KIR2DL4	N/A	N/A	N/A	1.000 (218)	1.000 (1269)
KIR2DL5	1.15746	0.323124	1	0.528 (115)	0.493 (625)
KIR2DL5A	1.01006	0.947869	1	0.372 (81)	0.375 (476)
KIR2DL5B	1.88193	7.77375e-05	0.00524006	0.344 (75)	0.217 (276)
KIR2DP1	1.475	0.42129	1	0.977 (213)	0.968 (1229)
KIR2DS1	0.88094	0.409801	1	0.358 (78)	0.394 (500)
KIR2DS2	1.0723	0.638007	1	0.537 (117)	0.521 (661)
KIR2DS3	1.35713	0.0520646	0.701904	0.344 (75)	0.279 (354)
KIR2DS3C	1.41704	0.0291489	0.654948	0.326 (71)	0.253 (321)
KIR2DS3T	1.42556	0.168637	1	0.096 (21)	0.070 (89)
KIR2DS4Del	1.04776	0.804388	1	0.812 (177)	0.801 (1016)
KIR2DS4wt	1.18202	0.270394	1	0.394 (86)	0.351 (446)
KIR2DS5	1.04556	0.785781	1	0.284 (62)	0.281 (357)
KIR2DS5C	3.77317	0.0224586	0.654948	0.023 (5)	0.006 (8)
KIR2DS5T	0.985863	0.932049	1	0.266 (58)	0.275 (349)
KIR3DL1	2.90261	0.0409117	0.689434	0.982 (214)	0.946 (1201)
KIR3DL2	N/A	N/A	N/A	1.000 (218)	1.000 (1269)
KIR3DL3	N/A	N/A	N/A	1.000 (218)	1.000 (1269)
KIR3DS1	1.06231	0.690522	1	0.390 (85)	0.381 (484)
* KIR2DS3 = KIR2DS3T + KIR2DS3C / KIR2DL5 = KIR2DL5B + KIR2DL5A / KIR2DS5 = KIR2DS5C + KIR2DS5T
Abbreviations; N/A: Not Applicable

[truncated: 13 more sheets: Supplementary Table 11, Supplementary Table 12, Supplementary Table 13, Supplementary Table 14, Supplementary Table 15, Supplementary Table 16, Supplementary Table 17, Supplementary Table 18, Supplementary Table 19, Supplementary Table 20, Supplementary Table 21, Supplementary Table 22, Supplementary Table 23]
